# Supplementary material for: Umbilical cord blood-derived Helios-positive regulatory T cells promote angiogenesis in acute lymphoblastic leukemia in mice via CCL22 and the VEGFA-VEGFR2 pathway
Source: PubMed Central journal article supplement — Mol Med Rep. 2019 Mar 21;19(5):4195–204. doi: 10.3892/mmr.2019.10074 (PMC6471064; doi:10.3892/mmr.2019.10074), 2019-03-21
Supplement: Supplementary_Data.pdf [file Supplementary_Data.pdf]

Figure S1. Regulation of the expression of Helios in umbilical cord blood Tregs on day 14 of culture. (A) Information of the lentiviral vectors of shRNA-Helios. (B) Transduction efficiency of shRNA-Helios was evaluated by flow cytometry. (C) Proportion of Helios<sup>+</sup> cells among CD4<sup>+</sup>CD25<sup>+</sup> Tregs on day 14 of the culture period after shRNA-Helios transduction. (\*\*\*)*P*<0.0005). Tregs, regulatory T cells; shRNA, short hairpin RNA.

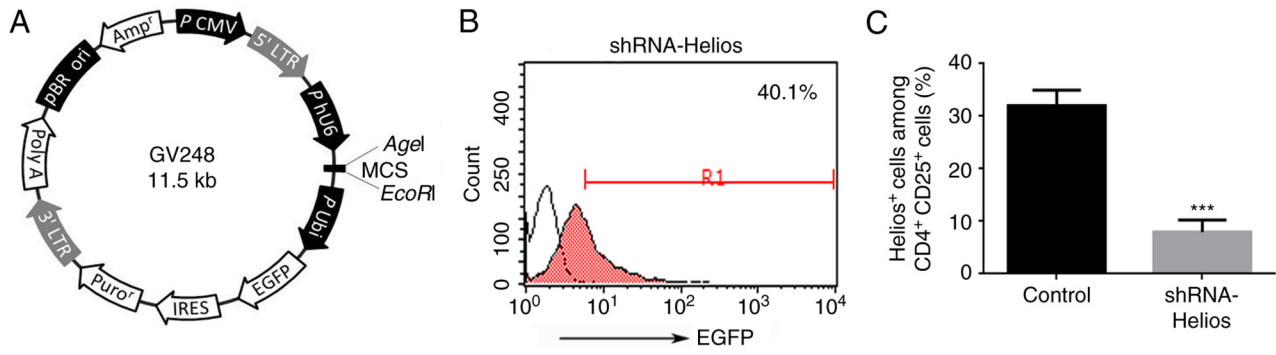

Figure S2. Effects of Helios on body weights and organ indices of acute lymphoblastic leukemia mice. (A) Changes of mouse weights in the blank, model, Helios<sup>low</sup> and Helios<sup>high</sup> groups over the course of 42 days. (B) Liver, spleen and kidney indices in blank, model, Helios<sup>low</sup> and Helios<sup>high</sup> groups. (\*\*P<0.0005, \*\*P<0.005, \*P<0.05).

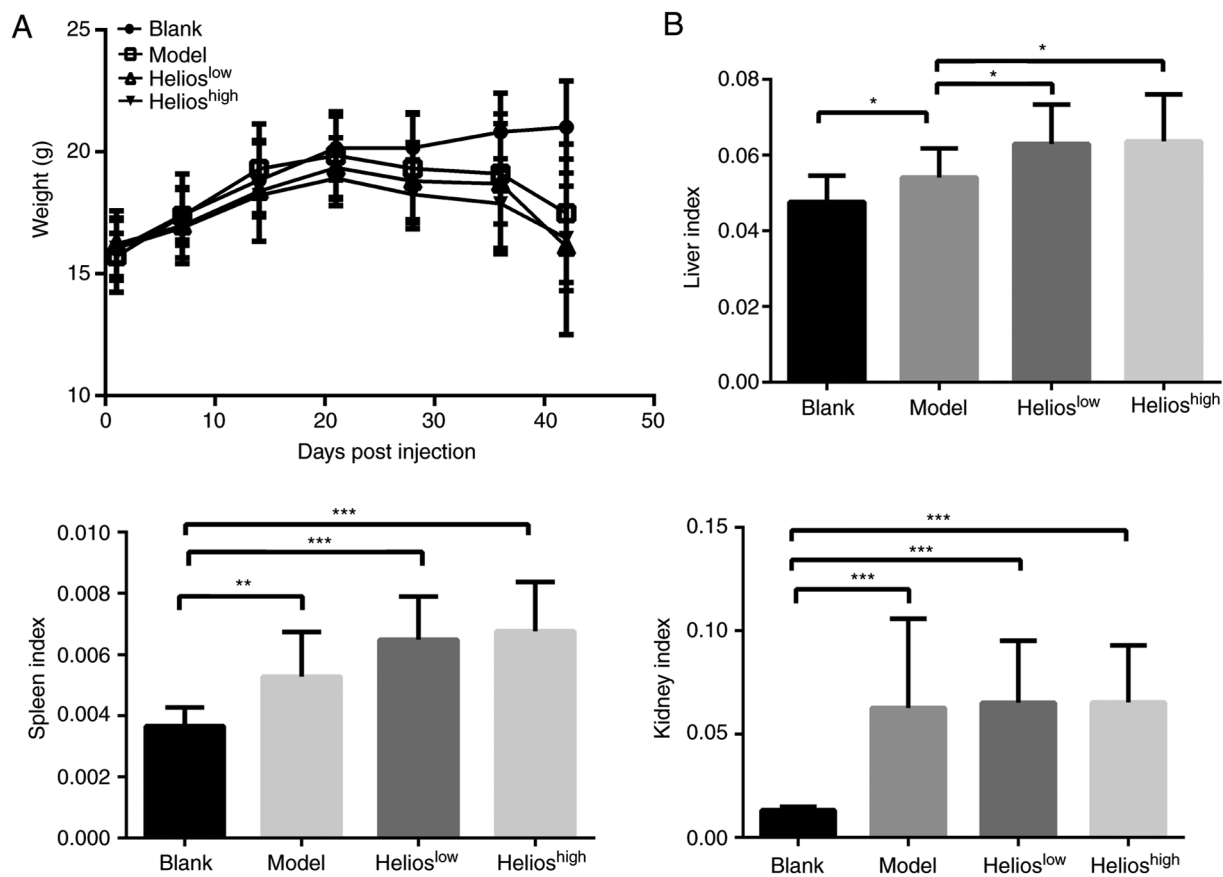

Table SI. Primers used in reverse transcription-quantitative polymerase chain reaction analysis.

| Gene ID        | Primer (5'-3')                         | Length (bp) |
|----------------|----------------------------------------|-------------|
| GAPDH          | Forward primer TCTCTGCTCCTCCCTGTTCT    | 20          |
|                | Reverse primer ATCCGTTACACCGACCTTC     | 20          |
| TGF- $\beta$ 1 | Forward primer CTCCCGTGGCTTCTAGTGC     | 19          |
|                | Reverse primer GCCTTAGTTTGGACAGGATCTG  | 22          |
| IL-10          | Forward primer GCTCTTGCACTACCAAAGCC    | 20          |
|                | Reverse primer CTGCTGATCCTCATGCCAGT    | 20          |
| CXCL6          | Forward primer GAGCTGCGTTGTGTTTGCTTA   | 21          |
|                | Reverse primer GTTTAGCTATGACTTCCACCGT  | 22          |
| CCL22          | Forward primer GCTGTGGCAATTCAGACCTC    | 20          |
|                | Reverse primer TGACGGATGTAGTCCTGGCA    | 20          |
| CCL28          | Forward primer CAAGCAGGGCTCACACTCAT    | 20          |
|                | Reverse primer GGCCATGGGAAGTATGGCTT    | 20          |
| Neuropilin 1   | Forward primer GGCACAGGTGATGACTTCCA    | 20          |
|                | Reverse primer ACCGTATGTCGGGAACTCTG    | 20          |
| IL17a          | Forward primer GGAGAGCTTCATCTGTGTCTCTG | 23          |
|                | Reverse primer TTGGCCTCAGTGTTTGGACA    | 20          |
| IFN- $\gamma$  | Forward primer CACCCTAAAGTGGAGCAGCC    | 20          |
|                | Reverse primer CGCCTCGTCTTTTGTTCGAT    | 20          |

TGF- $\beta$ 1, transforming growth factor- $\beta$ 1; IL, interleukin; CXCL, C-X-C motif chemokine; LIX, lipopolysaccharide-induced CXC chemokine; CCL, CC-chemokine ligand; IFN- $\gamma$ , interferon- $\gamma$ .
